## ERRATA

Errata for the technical paper "A General Correlation for Pool Film Boiling Heat Transfer From a Horizontal Cylinder to Subcooled Liquid: Part 1—A Theoretical Pool Film Boiling Heat Transfer Model Including Radiation Contributions and Its Analytical Solution," by A. Sakurai, M. Shiotsu, and K. Hata, JOURNAL OF HEAT TRANSFER, Vol. 112, pp. 430–440, May 1990.

Equation (16) of the referenced paper contained typographic errors as published. The correct equation is

$$\eta_v = N_v \frac{\gamma(x)}{r} \int_0^y \frac{\rho_v}{\rho_{vs}} dy, \quad \eta_l = N_l \frac{\gamma(x)}{r} \int_0^y \frac{\rho_l}{\rho_{ls}} dy \quad (16)$$

where  $\rho_l$  for  $0 \leq y \leq \delta$  is taken to be equal to  $\rho_{ls}$ .
